# Supplementary material
Source: PubMed Central journal article supplement (PMC4180081)
Supplement: jp501737x_si_001.pdf [file jp501737x_si_001.pdf]

# FORCE-FIELD INDEPENDENT METAL PARAMETERS USING A NON-BONDED DUMMY MODEL

Fernanda Duarte, Paul Bauer, Alexandre Barrozo, Beat Anton Amrein,  
Miha Purg, Johan Åqvist and Shina Caroline Lynn Kamerlin\*

Department of Cell and Molecular Biology, Uppsala University, BMC Box  
596, S-751 24 Uppsala, Sweden

Corresponding author email address: [kamerlin@icm.uu.se](mailto:kamerlin@icm.uu.se)

## Table of content

|                                                                                                                                                         |    |
|---------------------------------------------------------------------------------------------------------------------------------------------------------|----|
| <b>Table S1:</b> Comparison of calculated and observed solvation free energy using previously reported soft-sphere models .....                         | S2 |
| <b>Figure S1:</b> Radial distribution functions and coordination number using previously reported soft-sphere model.....                                | S3 |
| <b>Figure S2:</b> Radial distribution functions and coordination number for Ca <sup>2+</sup> dummy model.....                                           | S4 |
| <b>Figure S3:</b> Time-averages of the root mean square deviation of the protein backbone atoms for <i>E.coli</i> Glyoxalase with different metals..... | S4 |
| <b>Figure S4:</b> Time-averages of the root mean square deviation of the protein backbone atoms for <i>Human</i> Glyoxalase with different metals.....  | S5 |
| <b>References</b> .....                                                                                                                                 | S6 |

**Table S1:** A comparison of calculated and observed solvation free energies ( $\Delta G_{\text{hyd}}$ , kcal/mol), and ion-water oxygen distances ( $M^{2+}\text{-O}$ , Å) for  $\text{Zn}^{2+}$ ,  $\text{Ca}^{2+}$  and  $\text{Mg}^{2+}$  soft-sphere models employing parameters developed by Stote and Karplus<sup>1</sup> and Åqvist<sup>2</sup> <sup>a</sup>.

|                       |          |                                  |                                  |                      | TIP3P                   |                              | Experimental                       |                              |
|-----------------------|----------|----------------------------------|----------------------------------|----------------------|-------------------------|------------------------------|------------------------------------|------------------------------|
|                       | <b>e</b> | <b>A<sub>i</sub><sup>M</sup></b> | <b>B<sub>i</sub><sup>M</sup></b> | <b>m<sup>M</sup></b> | $\Delta G_{\text{hyd}}$ | $M^{2+}\text{-O}^{\text{a}}$ | $\Delta G_{\text{hyd}}^{\text{3}}$ | $M^{2+}\text{-O}^{\text{4}}$ |
| <b>ZN<sup>b</sup></b> | 2.0      | 54.98                            | 7.42                             | 65.4                 | -443.5±0.2              | 2.05±0.06                    | -483.3                             | 2.08                         |
| <b>MG</b>             | 2.0      | 96.0                             | 32.0                             | 24.3                 | -449.2±0.1              | 2.08±0.05                    | -454.2                             | 2.10                         |
| <b>CA</b>             | 2.0      | 264.1                            | 18.82                            | 40.1                 | -386.7±0.2              | 2.38±0.01                    | -379.5                             | 2.39-<br>2.46 <sup>5,6</sup> |

<sup>a</sup>All values are averages and standard deviations over 5 trajectories, as outlined in the main text. M-O distances for all the water molecules bound to the metal were monitored along the simulations with sampling every 0.5 ps, and averages over the entire simulation are presented here. With the exception of  $\text{Ca}^{2+}$ , which shows a rapid water exchange, the M-O distance was directly taken from the peak of the RDF (see Figure S1). <sup>b</sup>The original Stote and Karplus parameters<sup>1</sup>,  $\sigma(\text{Å})=1.95$  and  $\epsilon(\text{kcal/mol})=0.25$ , were converted using the following expression  $A=\sqrt{4\epsilon(\sigma)^2}$  and  $B=\sqrt{4\epsilon(\sigma)6}$ .

**Figure S1:** Radial distribution functions ( $g(r)$ ,  $y_1$ -axis) and coordination number ( $N[g(r)]$ ,  $y_2$ -axis) corresponding to the first hydration shell of (A)  $\text{Zn}^{2+}$ , (B)  $\text{Ca}^{2+}$ , and (C)  $\text{Mg}^{2+}$  obtained using the soft-sphere models parameters presented in Table S1. In all cases, the  $\text{M}^{2+}$ -O  $g(r)$  are represented by solid lines and the  $N[g(r)]$  by dashed lines.

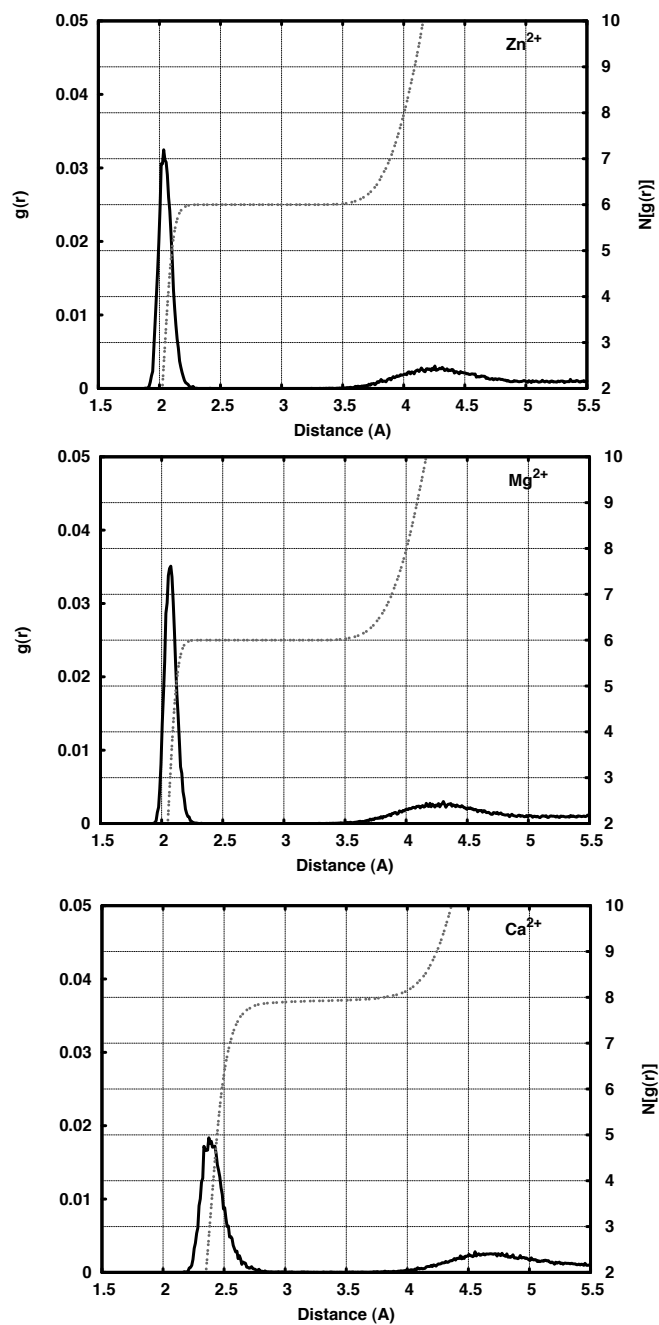

**Figure S2:** Radial distribution functions ( $g(r)$ ,  $y_1$ -axis) and coordination number ( $N[g(r)]$ ,  $y_2$ -axis) corresponding to the first hydration shell of (A)  $\text{Ca}^{2+}$  dummy model from Sept *et al*<sup>7</sup> and (B) the new  $\text{Ca}^{2+}$ -dummy model presented in this work.

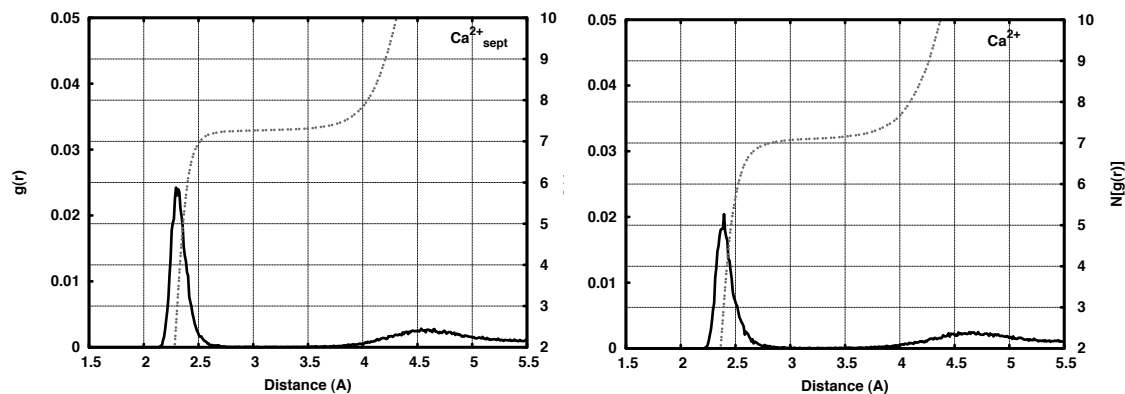

**Figure S3:** Time-averages of the root mean square deviation (in Å) of the protein backbone atoms ( $\text{RMSD}_{\text{backbone}}^a$ ) for *E.coli* Glyoxalase with different metals.

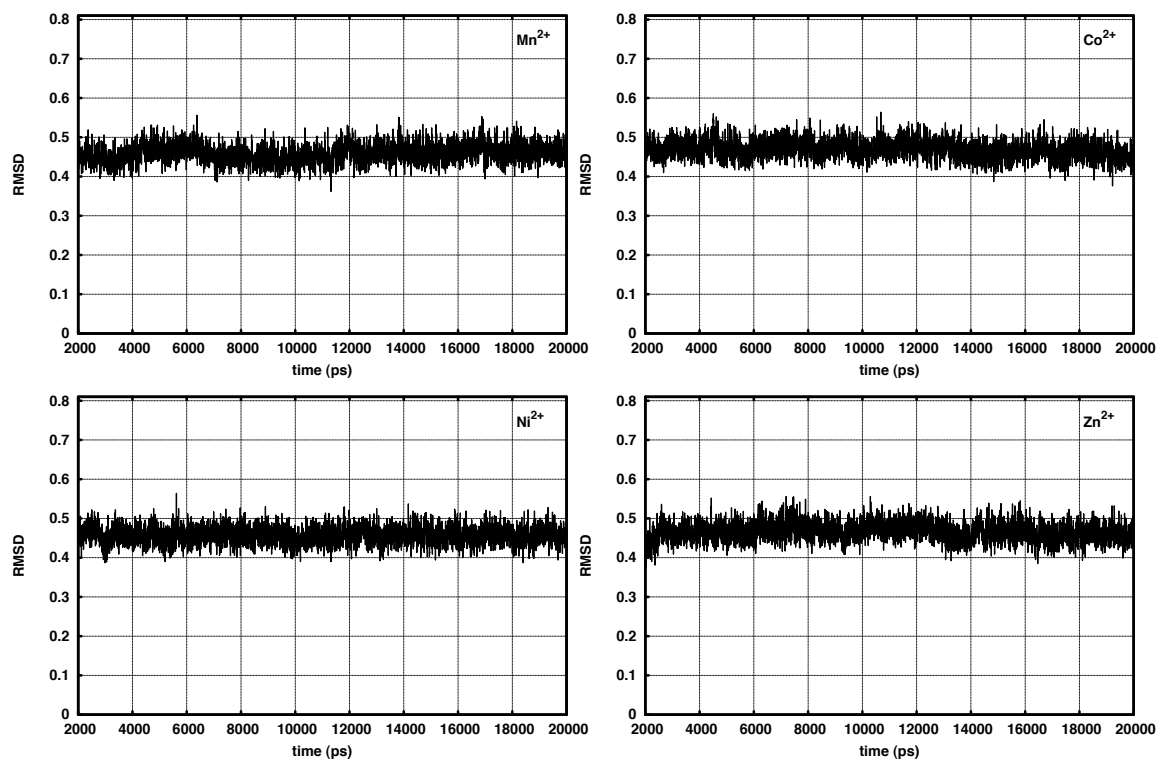

<sup>a</sup>RMSD for the protein backbone have been calculated taken into account only the atoms within 20Å of the system center, i.e those that are inside the solvent sphere and are not subject to any restraint apart from the weak 0.1kcal/mol harmonic restraint mentioned in the main text.

**Figure S4:** Time-averages of the root mean square deviation (in Å) of the protein backbone atoms ( $\text{RMSD}_{\text{backbone}}$ ) for *Human GlxI* with different metals<sup>a</sup>.

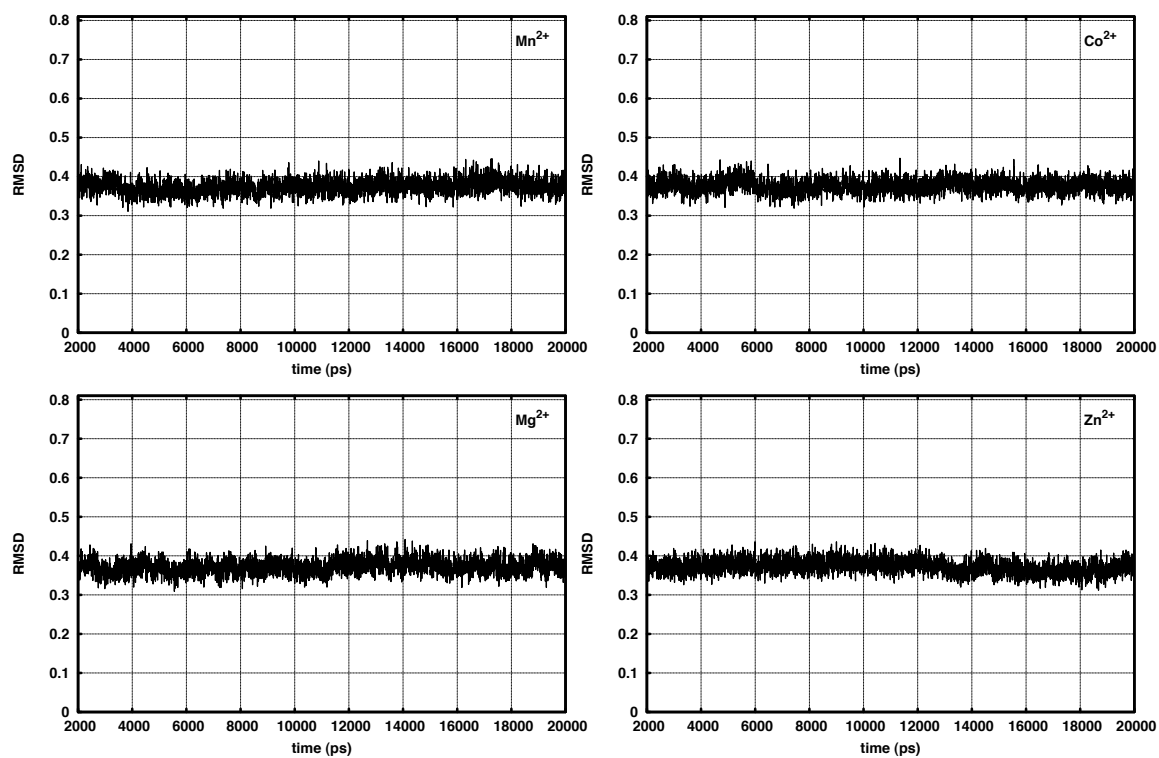

<sup>a</sup>RMSD for the protein backbone have been calculated taken into account only the atoms within 20Å of the system center, i.e those that are inside the solvent sphere and are not subject to any restraint apart from the weak 0.1kcal/mol harmonic restraint mentioned in the main text.

## References

1. Stote, R. H.; Karplus, M., Zinc-binding in proteins and solution - a simple but accurate nonbonded representation. *Proteins* **1995**, *23*, 12-31.
2. Åqvist, J., Modeling of ion ligand interactions in solutions and biomolecules. *J. Mol. Struct.-Theochem* **1992**, *88*, 135-152.
3. Noyes, R. M., Thermodynamics of Ion hydration as a measure of effective dielectric properties of water. *J. Am. Chem. Soc.* **1962**, *84*, 513-522.
4. Persson, I., Hydrated metal ions in aqueous solution: How regular are their structures? *Pure Appl. Chem.* **2010**, *82*, 1901-1917.
5. Probst, M. M.; Radnai, T.; Heinzinger, K.; Bopp, P.; Rode, B. M., Molecular-Dynamics and X-Ray-Investigation of an Aqueous CaCl<sub>2</sub> Solution. *J. Phys. Chem.* **1985**, *89*, 753-759.
6. Jalilehvand, F.; Spangberg, D.; Lindqvist-Reis, P.; Hermansson, K.; Persson, I.; Sandstrom, M., Hydration of the calcium ion. An EXAFS, large-angle x-ray scattering, and molecular dynamics simulation study. *J. Am. Chem. Soc.* **2001**, *123*, 431-441.
7. Saxena, A.; Sept, D., Multisite Ion Models That Improve Coordination and Free Energy Calculations in Molecular Dynamics Simulations. *J. Chem. Theory Comput.* **2013**, *9*, 3538-3542.
